# Supplementary material for: Short-term transport stress and supplementation alter immune function in aged horses
Source: PLoS One. 2021 Aug 19;16(8):e0254139. doi: 10.1371/journal.pone.0254139 (PMC8376036; doi:10.1371/journal.pone.0254139)
Supplement: S1 File — (XLSX) [file pone.0254139.s001.xlsx]

## Sheet: BodyWeight
Horse #	Group	Time point	Body weight (kg)
Horse 1	Control	Day -21	419.573
Horse 1	Control	Day 21 post-transport	419.12
Horse 1	Control	Day 3 post-transport	419.12
Horse 1	Control	Day 7 post-transport	415.491
Horse 1	Control	Pre-transport	416.852
Horse 2	Control	Day 21 post-transport	532.064
Horse 2	Control	Day 3 post-transport	532.518
Horse 2	Control	Day 7 post-transport	534.786
Horse 2	Control	Pre-transport	532.972
Horse 2	Control	Day -21	531.157
Horse 3	Control	Day 21 post-transport	600.557
Horse 3	Control	Day 3 post-transport	605.093
Horse 3	Control	Day 7 post-transport	606
Horse 3	Control	Pre-transport	606.907
Horse 3	Control	Day -21	620.515
Horse 4	Control	Day 21 post-transport	507.57
Horse 4	Control	Day 3 post-transport	503.488
Horse 4	Control	Day 7 post-transport	511.653
Horse 4	Control	Pre-transport	526.621
Horse 4	Control	Day -21	527.982
Horse 5	Control	Day 21 post-transport	513.014
Horse 5	Control	Day 3 post-transport	513.014
Horse 5	Control	Day 7 post-transport	515.282
Horse 5	Control	Pre-transport	508.478
Horse 5	Control	Day -21	510.292
Horse 6	Control	Day -21	544.765
Horse 6	Control	Day 21 post-transport	591.485
Horse 6	Control	Day 3 post-transport	552.476
Horse 6	Control	Day 7 post-transport	549.301
Horse 6	Control	Pre-transport	544.765
Horse 7	Ventil-ate	Day -21	453.593
Horse 7	Ventil-ate	Day 21 post-transport	449.964
Horse 7	Ventil-ate	Day 3 post-transport	448.15
Horse 7	Ventil-ate	Day 7 post-transport	456.314
Horse 7	Ventil-ate	Pre-transport	451.325
Horse 8	Ventil-ate	Day -21	519.817
Horse 8	Ventil-ate	Day 21 post-transport	516.189
Horse 8	Ventil-ate	Day 3 post-transport	512.56
Horse 8	Ventil-ate	Day 7 post-transport	514.828
Horse 8	Ventil-ate	Pre-transport	513.014
Horse 9	Ventil-ate	Day -21	577.424
Horse 9	Ventil-ate	Day 21 post-transport	537.054
Horse 9	Ventil-ate	Day 3 post-transport	591.939
Horse 9	Ventil-ate	Day 7 post-transport	591.939
Horse 9	Ventil-ate	Pre-transport	590.578
Horse 10	Ventil-ate	Day -21	537.054
Horse 10	Ventil-ate	Day 21 post-transport	546.579
Horse 10	Ventil-ate	Day 3 post-transport	555.651
Horse 10	Ventil-ate	Day 7 post-transport	554.744
Horse 10	Ventil-ate	Pre-transport	546.126
Horse 11	Ventil-ate	Day 21 post-transport	601.464
Horse 11	Ventil-ate	Day 3 post-transport	590.124
Horse 11	Ventil-ate	Day 7 post-transport	591.032
Horse 11	Ventil-ate	Pre-transport	593.753
Horse 11	Ventil-ate	Day -21	591.485
Horse 12	Ventil-ate	Day -21	513.467
Horse 12	Ventil-ate	Day 21 post-transport	520.271
Horse 12	Ventil-ate	Day 3 post-transport	528.889
Horse 12	Ventil-ate	Day 7 post-transport	516.189
Horse 12	Ventil-ate	Pre-transport	524.807

## Sheet: HeartRate
Horse #	Group	Time point	Heart rate (bpm)
Horse 1	Control	15-min post-transport	44
Horse 1	Control	15-min pre-transport	42
Horse 2	Control	15-min post-transport	48
Horse 2	Control	15-min pre-transport	48
Horse 3	Control	15-min post-transport	38
Horse 3	Control	15-min pre-transport	48
Horse 4	Control	15-min post-transport	46
Horse 4	Control	15-min pre-transport	48
Horse 5	Control	15-min post-transport	44
Horse 5	Control	15-min pre-transport	44
Horse 6	Control	15-min post-transport	48
Horse 6	Control	15-min pre-transport	50
Horse 7	Ventil-ate	15-min post-transport	44
Horse 7	Ventil-ate	15-min pre-transport	42
Horse 8	Ventil-ate	15-min post-transport	40
Horse 8	Ventil-ate	15-min pre-transport	36
Horse 9	Ventil-ate	15-min post-transport	42
Horse 9	Ventil-ate	15-min pre-transport	42
Horse 10	Ventil-ate	15-min post-transport	50
Horse 10	Ventil-ate	15-min pre-transport	52
Horse 11	Ventil-ate	15-min post-transport	42
Horse 11	Ventil-ate	15-min pre-transport	54
Horse 12	Ventil-ate	15-min post-transport	40
Horse 12	Ventil-ate	15-min pre-transport	42

## Sheet: BodyTemperature
Horse #	Group	Time point	Body temperature (°F)
Horse 1	Control	15-min post-transport	99.1
Horse 1	Control	15-min pre-transport	98.6
Horse 1	Control	Day 1 post-transport	97.2
Horse 1	Control	Day 14 post-transport	98.3
Horse 1	Control	Day -21	96.9
Horse 1	Control	Day 21 post-transport	98.1
Horse 1	Control	Day 3 post-transport	99.1
Horse 1	Control	Day 7 post-transport	97.9
Horse 2	Control	15-min post-transport	99.4
Horse 2	Control	15-min pre-transport	97.7
Horse 2	Control	Day 1 post-transport	98.7
Horse 2	Control	Day 14 post-transport	96.3
Horse 2	Control	Day 21 post-transport	98.4
Horse 2	Control	Day 3 post-transport	96.6
Horse 2	Control	Day 7 post-transport	97.2
Horse 2	Control	Day -21	96.9
Horse 3	Control	15-min post-transport	98.8
Horse 3	Control	15-min pre-transport	98.6
Horse 3	Control	Day 1 post-transport	98.1
Horse 3	Control	Day 14 post-transport	97.2
Horse 3	Control	Day 21 post-transport	97.7
Horse 3	Control	Day 3 post-transport	96.9
Horse 3	Control	Day 7 post-transport	98.1
Horse 3	Control	Day -21	97.8
Horse 4	Control	15-min post-transport	99.8
Horse 4	Control	15-min pre-transport	99.4
Horse 4	Control	Day 1 post-transport	96
Horse 4	Control	Day 14 post-transport	97.4
Horse 4	Control	Day 21 post-transport	99.5
Horse 4	Control	Day 3 post-transport	96.3
Horse 4	Control	Day 7 post-transport	99.4
Horse 4	Control	Day -21	98.1
Horse 5	Control	15-min post-transport	100
Horse 5	Control	15-min pre-transport	99
Horse 5	Control	Day 1 post-transport	99.2
Horse 5	Control	Day 14 post-transport	97.7
Horse 5	Control	Day 21 post-transport	98.4
Horse 5	Control	Day 3 post-transport	99.1
Horse 5	Control	Day 7 post-transport	98.5
Horse 5	Control	Day -21	98
Horse 6	Control	15-min post-transport	99.2
Horse 6	Control	15-min pre-transport	98.6
Horse 6	Control	Day 1 post-transport	96.7
Horse 6	Control	Day 14 post-transport	98.1
Horse 6	Control	Day -21	97.3
Horse 6	Control	Day 21 post-transport	98.2
Horse 6	Control	Day 3 post-transport	96.1
Horse 6	Control	Day 7 post-transport	98.6
Horse 7	Ventil-ate	15-min post-transport	98.4
Horse 7	Ventil-ate	15-min pre-transport	99.2
Horse 7	Ventil-ate	Day 1 post-transport	98.4
Horse 7	Ventil-ate	Day 14 post-transport	98.1
Horse 7	Ventil-ate	Day -21	98.6
Horse 7	Ventil-ate	Day 21 post-transport	98
Horse 7	Ventil-ate	Day 3 post-transport	96.1
Horse 7	Ventil-ate	Day 7 post-transport	99.1
Horse 8	Ventil-ate	15-min post-transport	99.5
Horse 8	Ventil-ate	15-min pre-transport	98.5
Horse 8	Ventil-ate	Day 1 post-transport	96.9
Horse 8	Ventil-ate	Day 14 post-transport	98.5
Horse 8	Ventil-ate	Day -21	97.2
Horse 8	Ventil-ate	Day 21 post-transport	98.4
Horse 8	Ventil-ate	Day 3 post-transport	97.9
Horse 8	Ventil-ate	Day 7 post-transport	98.7
Horse 9	Ventil-ate	15-min post-transport	99
Horse 9	Ventil-ate	15-min pre-transport	97.7
Horse 9	Ventil-ate	Day 1 post-transport	97.5
Horse 9	Ventil-ate	Day 14 post-transport	97.2
Horse 9	Ventil-ate	Day -21	97.3
Horse 9	Ventil-ate	Day 21 post-transport	97.7
Horse 9	Ventil-ate	Day 3 post-transport	97.4
Horse 9	Ventil-ate	Day 7 post-transport	98.2
Horse 10	Ventil-ate	15-min post-transport	99.4
Horse 10	Ventil-ate	15-min pre-transport	98.4
Horse 10	Ventil-ate	Day 1 post-transport	97.1
Horse 10	Ventil-ate	Day 14 post-transport	94.2
Horse 10	Ventil-ate	Day -21	97
Horse 10	Ventil-ate	Day 21 post-transport	97.9
Horse 10	Ventil-ate	Day 3 post-transport	98
Horse 10	Ventil-ate	Day 7 post-transport	98.5
Horse 11	Ventil-ate	15-min post-transport	100.3
Horse 11	Ventil-ate	15-min pre-transport	99.1
Horse 11	Ventil-ate	Day 1 post-transport	98.8
Horse 11	Ventil-ate	Day 14 post-transport	97
Horse 11	Ventil-ate	Day 21 post-transport	97.5
Horse 11	Ventil-ate	Day 3 post-transport	99.4
Horse 11	Ventil-ate	Day 7 post-transport	98
Horse 11	Ventil-ate	Day -21	98.4
Horse 12	Ventil-ate	15-min post-transport	99.1
Horse 12	Ventil-ate	15-min pre-transport	98.6
Horse 12	Ventil-ate	Day 1 post-transport	96.9
Horse 12	Ventil-ate	Day 14 post-transport	95.7
Horse 12	Ventil-ate	Day -21	96.8
Horse 12	Ventil-ate	Day 21 post-transport	99
Horse 12	Ventil-ate	Day 3 post-transport	97.1
Horse 12	Ventil-ate	Day 7 post-transport	98.8

## Sheet: TotalCortisol
Horse #	Group	Time point	Serum total cortisol (μg/dL)
Horse 1	Control	15-min post-transport	5.34
Horse 1	Control	15-min pre-transport	2.65
Horse 1	Control	Day 1 post-transport	1.36
Horse 1	Control	Day 14 post-transport	2.84
Horse 1	Control	Day -21	2.42
Horse 1	Control	Day 21 post-transport	2.01
Horse 1	Control	Day 3 post-transport	3.14
Horse 1	Control	Day 7 post-transport	2.07
Horse 2	Control	15-min post-transport	5.59
Horse 2	Control	15-min pre-transport	2.96
Horse 2	Control	Day 1 post-transport	3.07
Horse 2	Control	Day 14 post-transport	2.49
Horse 2	Control	Day 21 post-transport	2.62
Horse 2	Control	Day 3 post-transport	2.77
Horse 2	Control	Day 7 post-transport	3.51
Horse 2	Control	Day -21	2.4
Horse 3	Control	15-min post-transport	6.35
Horse 3	Control	15-min pre-transport	4.02
Horse 3	Control	Day 1 post-transport	2.81
Horse 3	Control	Day 14 post-transport	3.35
Horse 3	Control	Day 21 post-transport	3.69
Horse 3	Control	Day 3 post-transport	3.77
Horse 3	Control	Day 7 post-transport	3.89
Horse 3	Control	Day -21	3.15
Horse 4	Control	15-min post-transport	7.93
Horse 4	Control	15-min pre-transport	4.77
Horse 4	Control	Day 1 post-transport	2.01
Horse 4	Control	Day 14 post-transport	3.48
Horse 4	Control	Day 21 post-transport	3.42
Horse 4	Control	Day 3 post-transport	2.88
Horse 4	Control	Day 7 post-transport	2.78
Horse 4	Control	Day -21	3
Horse 5	Control	15-min post-transport	5.4
Horse 5	Control	15-min pre-transport	2.75
Horse 5	Control	Day 1 post-transport	2.45
Horse 5	Control	Day 14 post-transport	2.79
Horse 5	Control	Day 21 post-transport	2.82
Horse 5	Control	Day 3 post-transport	2.9
Horse 5	Control	Day 7 post-transport	2.69
Horse 5	Control	Day -21	2.98
Horse 6	Control	15-min post-transport	6.22
Horse 6	Control	15-min pre-transport	4.81
Horse 6	Control	Day 1 post-transport	3.66
Horse 6	Control	Day 14 post-transport	4.27
Horse 6	Control	Day -21	3.47
Horse 6	Control	Day 21 post-transport	5
Horse 6	Control	Day 3 post-transport	3.8
Horse 6	Control	Day 7 post-transport	4.04
Horse 7	Ventil-ate	15-min post-transport	6.76
Horse 7	Ventil-ate	15-min pre-transport	3.53
Horse 7	Ventil-ate	Day 1 post-transport	3.93
Horse 7	Ventil-ate	Day 14 post-transport	2.96
Horse 7	Ventil-ate	Day -21	4.41
Horse 7	Ventil-ate	Day 21 post-transport	4.07
Horse 7	Ventil-ate	Day 3 post-transport	4.06
Horse 7	Ventil-ate	Day 7 post-transport	3.09
Horse 8	Ventil-ate	15-min post-transport	5.68
Horse 8	Ventil-ate	15-min pre-transport	2.28
Horse 8	Ventil-ate	Day 1 post-transport	2.14
Horse 8	Ventil-ate	Day 14 post-transport	3.6
Horse 8	Ventil-ate	Day -21	2.26
Horse 8	Ventil-ate	Day 21 post-transport	1.51
Horse 8	Ventil-ate	Day 3 post-transport	2.03
Horse 8	Ventil-ate	Day 7 post-transport	3.46
Horse 9	Ventil-ate	15-min post-transport	6.8
Horse 9	Ventil-ate	15-min pre-transport	3.4
Horse 9	Ventil-ate	Day 1 post-transport	3.41
Horse 9	Ventil-ate	Day 14 post-transport	2.53
Horse 9	Ventil-ate	Day -21	2.71
Horse 9	Ventil-ate	Day 21 post-transport	2.34
Horse 9	Ventil-ate	Day 3 post-transport	3.11
Horse 9	Ventil-ate	Day 7 post-transport	3.54
Horse 10	Ventil-ate	15-min post-transport	7.21
Horse 10	Ventil-ate	15-min pre-transport	5.06
Horse 10	Ventil-ate	Day 1 post-transport	3.1
Horse 10	Ventil-ate	Day 14 post-transport	2.82
Horse 10	Ventil-ate	Day -21	2.28
Horse 10	Ventil-ate	Day 21 post-transport	4.2
Horse 10	Ventil-ate	Day 3 post-transport	4.19
Horse 10	Ventil-ate	Day 7 post-transport	5.56
Horse 11	Ventil-ate	15-min post-transport	5.77
Horse 11	Ventil-ate	15-min pre-transport	3.97
Horse 11	Ventil-ate	Day 1 post-transport	3.5
Horse 11	Ventil-ate	Day 14 post-transport	2.92
Horse 11	Ventil-ate	Day 21 post-transport	3.73
Horse 11	Ventil-ate	Day 3 post-transport	2.99
Horse 11	Ventil-ate	Day 7 post-transport	3.37
Horse 11	Ventil-ate	Day -21	2.63
Horse 12	Ventil-ate	15-min post-transport	6.57
Horse 12	Ventil-ate	15-min pre-transport	2.38
Horse 12	Ventil-ate	Day 1 post-transport	1.65
Horse 12	Ventil-ate	Day 14 post-transport	1.77
Horse 12	Ventil-ate	Day -21	3.22
Horse 12	Ventil-ate	Day 21 post-transport	2.79
Horse 12	Ventil-ate	Day 3 post-transport	3.86
Horse 12	Ventil-ate	Day 7 post-transport	1.98

## Sheet: GeneExpression_WholeBlood
Horse #	Group	Time point	LnRQ IFNγ	LnRQ IL-1β	LnRQ IL-2	LnRQ IL-4	LnRQ IL-6	LnRQ IL-8	LnRQ IL-10	LnRQ IL-12α	LnRQ IL-17α	LnRQ SAA1	LnRQ TNFα
Horse 1	Control	15-min post-transport	-0.529453	-0.303869	0.102439	-0.210739	-0.158112	-0.438424	-0.356581	-0.345607	-0.824499	0.606374	-1.50452
Horse 1	Control	15-min pre-transport	-0.00690115	-0.0944531	-0.0180949	-0.424013	-0.53512	-0.0364148	0.0423715	-0.122253	0.558136	0.00732602	0.135806
Horse 1	Control	Day 1 post-transport	-0.168254	-0.0164342	-0.414298	-0.751699	-0.292252	-0.277887	-0.167378	-0.321888	-0.166282	-0.28023	0.19821
Horse 1	Control	Day 14 post-transport	-0.317524	-0.277361	-0.315507	-0.241617	-0.432713	-0.59187	-0.32413	-0.414534	-0.0766028	0.777841	-0.7465
Horse 1	Control	Day -21	-0.0330706	0.506622	-0.226837	-0.332754	-0.231061	-0.157496	-0.108487	-0.11605	-0.623163	0.13425	0.11583
Horse 1	Control	Day 21 post-transport	-0.096396	0.286524	0.00698555	-0.51878	0.114055	-0.107602	0.0422258	-0.0158593	-0.733395	0.113312	0.504154
Horse 1	Control	Day 3 post-transport	-0.501253	-0.20235	-0.317209	-0.539173	-0.346707	-0.441028	-0.612396	-0.591157	-0.637774	0.559347	-0.70297
Horse 1	Control	Day 7 post-transport	-0.0357404	0.132431	-0.205724	-0.552778	0.172248	-0.601559	0.135102	-0.346578	-0.282916	-0.0535118	0.361679
Horse 2	Control	15-min post-transport	-0.186904	-0.258825	0.975036	1.12631	0.860318	0.0347855	0.549994	0.290804	0.522177	0.557631	-0.238187
Horse 2	Control	15-min pre-transport	0.733353	0.49364	0.691109	1.0434	0.0868728	-0.0510579	0.628393	0.610377	0.788747	0.602302	0.96935
Horse 2	Control	Day 1 post-transport	0.482044	0.303687	0.285829	0.748583	-0.00900675	0.385092	0.491064	0.348212	0.906538	-0.228356	0.691336
Horse 2	Control	Day 14 post-transport	0.489658	0.276547	0.288102	0.760895	0.103303	0.447449	0.308261	0.432487	0.798875	0.546055	0.232952
Horse 2	Control	Day 21 post-transport	0.0960743	-0.0101811	-0.00601338	0.549572	-0.314651	-0.247101	0.317258	0.223671	-0.778925	-0.0415159	0.489915
Horse 2	Control	Day 3 post-transport	0.238472	0.222218	-0.110267	0.76645	0.163528	-0.0201312	0.507576	0.372969	0.522426	0.557257	0.720303
Horse 2	Control	Day 7 post-transport	0.0776558	-0.000541518	0.239747	0.99355	0.0943368	0.292194	-0.0169867	0.37895	0.387433	1.16593	-0.198244
Horse 2	Control	Day -21	0.531232	0.189836	0.32876	1.01387	0.0347625	-0.18937	0.334414	0.363279	0.55064	0.409083	0.313547
Horse 3	Control	15-min post-transport	0.578253	0.473303	0.869161	0.108305	1.4327	0.238979	0.560881	0.896414	-0.328182	0.787015	0.489176
Horse 3	Control	15-min pre-transport	0.707774	0.562506	0.591393	0.151715	0.851475	-0.239156	0.544464	0.64462	0.150162	1.86027	-0.0864704
Horse 3	Control	Day 1 post-transport	0.857832	0.156819	0.634344	0.12138	0.915514	-0.302976	0.525208	0.791139	0.5169	0.805258	0.614656
Horse 3	Control	Day 14 post-transport	1.27309	0.282304	0.635973	0.250891	0.944184	-0.678809	0.75827	0.791661	0.111757	0.628903	0.882463
Horse 3	Control	Day 21 post-transport	0.690299	0.140469	0.624716	0.285899	0.954439	-0.217726	0.591183	0.694673	0.0210074	0.770265	0.372209
Horse 3	Control	Day 3 post-transport	1.02321	0.457852	0.428168	0.0963436	0.723515	-0.103666	0.344251	0.643094	0.282958	1.00203	0.649512
Horse 3	Control	Day 7 post-transport	0.84707	0.0955887	0.449368	0.472681	0.844905	-0.35351	0.690038	0.675543	0.892452	-0.0785191	0.767942
Horse 3	Control	Day -21	0.873716	-0.0422792	0.340634	0.0348913	0.847889	0.262149	0.577527	0.7554	0.799865	0.434827	0.618786
Horse 4	Control	15-min post-transport	-0.403235	-0.531223	0.376502	0.221576	0.710861	0.598153	0.414939	0.18591	-0.0218019	0.479527	-0.376099
Horse 4	Control	15-min pre-transport	0.509727	-0.12352	0.270099	0.526928	0.354958	0.25388	0.478695	0.216292	-0.939105	1.14691	-0.333085
Horse 4	Control	Day 1 post-transport	0.156553	-0.26644	0.182516	0.505606	0.02809	0.278288	0.236792	0.0744828	-0.488589	0.878897	-0.630005
Horse 4	Control	Day 14 post-transport	0.237648	0.0452963	-0.115858	0.296463	0.167804	-0.0982152	0.400006	0.0344406	0.118444	-2.11728	-0.394974
Horse 4	Control	Day 21 post-transport	0.204316	-0.674767	0.0172316	0.438974	0.169231	-0.341633	0.249611	0.0493911	-0.0129056	-0.565959	0.0983531
Horse 4	Control	Day 3 post-transport	0.243064	-0.566746	-0.0613964	0.206507	-0.232183	-0.105747	-0.00882529	-0.0309912	-0.73891	0.458199	-0.512665
Horse 4	Control	Day 7 post-transport	0.561523	-0.363517	0.389081	0.52511	0.455272	0.0691786	0.634427	0.457604	0.328704	0.26916	0.573437
Horse 4	Control	Day -21	0.235762	-0.400311	0.307353	0.40103	0.143748	-0.0244543	0.292766	0.0879436	0.632153	0.304064	-0.0844933
Horse 5	Control	15-min post-transport	-0.25947	0.137225	1.19531	0.632922	0.777353	0.435872	0.546773	0.697775	-0.162276	1.01358	0.466124
Horse 5	Control	15-min pre-transport	0.202259	0.576637	0.757305	0.092273	0.264209	0.208374	0.100259	0.419068	0.550275	0.766302	0.706486
Horse 5	Control	Day 1 post-transport	0.138247	0.371263	0.434643	-0.260234	0.0792324	0.31978	0.0782233	0.342192	0.635514	1.04919	0.682003
Horse 5	Control	Day 14 post-transport	0.0840727	0.313841	0.444753	-0.223575	0.687732	-0.234	0.200693	0.312283	0.415486	0.417996	0.47628
Horse 5	Control	Day 21 post-transport	0.46383	0.388314	0.56946	0.0896773	0.972005	-0.274049	0.42535	0.613803	0.680268	0.93477	0.91471
Horse 5	Control	Day 3 post-transport	0.00352199	0.317498	0.525065	0.171763	0.226949	-0.291121	-0.0295352	0.276358	0.243142	1.31649	-0.115753
Horse 5	Control	Day 7 post-transport	0.694083	1.03169	1.08156	0.700147	1.10476	0.548397	0.650585	0.833738	1.0795	2.0981	0.398216
Horse 5	Control	Day -21	0.133105	0.660428	0.749627	0.0170736	0.637837	0.292299	0.211685	0.492126	0.851154	0.676053	0.703634
Horse 6	Control	15-min post-transport	-0.694828	0.214665	-0.221748	-0.128289	-0.694067	0.151694	-0.184077	-0.138893	-0.129658	1.70445	-0.693223
Horse 6	Control	15-min pre-transport	-0.184154	0.702597	-0.242264	-0.155901	-1.02241	0.32189	0.233966	0.0166157	-0.51928	2.04368	0.252463
Horse 6	Control	Day 1 post-transport	-0.151969	1.01513	-0.121516	-0.123282	-0.924259	0.604694	0.159919	0.157098	0.208357	2.25616	-0.0466702
Horse 6	Control	Day 14 post-transport	-0.498238	0.532793	-0.499223	-0.319003	-1.09581	-0.0919312	-0.236123	-0.128496	-0.136712	1.74138	-0.603598
Horse 6	Control	Day -21	-0.21926	0.103116	-0.0881812	-0.419695	-1.23713	0.0907919	0.124168	-0.0991772	-0.304095	1.02898	0.142813
Horse 6	Control	Day 21 post-transport	0.0637598	0.183611	-0.612339	-0.356202	-0.760238	-0.0922556	0.786796	-0.121255	-0.443776	1.55804	-0.224104
Horse 6	Control	Day 3 post-transport	-0.310215	0.561061	-0.225949	-0.175981	-1.27082	0.0133438	0.130856	0.0480863	0.355994	2.0397	0.0583431
Horse 6	Control	Day 7 post-transport	-0.465177	0.453419	-0.572705	-0.330708	-1.10357	0.1416	-0.0452005	-0.0700041	-0.281722	1.69374	-0.172307
Horse 7	Ventil-ate	15-min post-transport	-0.540519	-0.952634	0.479246	0.524472	-0.0547525	0.604549	-0.000448221	-0.101163	-1.37902	-0.507376	-0.753961
Horse 7	Ventil-ate	15-min pre-transport	-0.00474806	-0.589847	0.331709	0.316012	-0.431309	0.474033	-0.166795	-0.245507	0.436761	0.110744	-0.639985
Horse 7	Ventil-ate	Day 1 post-transport	0.10047	-0.343525	0.595477	0.302572	-0.0435723	-0.294489	-0.0721066	-0.115936	0.626187	-0.289073	0.424672
Horse 7	Ventil-ate	Day 14 post-transport	-0.357645	-0.987589	0.317923	0.712801	-0.376036	0.16784	-0.301872	-0.169666	-0.677258	-0.573093	-0.539311
Horse 7	Ventil-ate	Day -21	-0.223892	-0.426199	0.0700104	0.0418636	-0.143649	-0.00528409	-0.0480049	-0.372658	-0.840796	-0.303554	0.301974
Horse 7	Ventil-ate	Day 21 post-transport	-0.181912	-0.422263	0.425598	0.329042	-0.215576	0.187382	-0.133066	-0.265552	0.0344692	-1.51122	0.0589996
Horse 7	Ventil-ate	Day 3 post-transport	-0.00838538	-0.156762	0.123344	0.273197	-0.327383	0.426892	-0.178519	-0.130234	0.116917	-0.671555	-0.201524
Horse 7	Ventil-ate	Day 7 post-transport	-0.332911	-0.938948	0.265499	0.28836	-1.27105	0.589066	0.185171	-0.136002	0.49333	-1.0555	-0.192134
Horse 8	Ventil-ate	15-min post-transport	-0.412562	-0.61629	-0.0368666	-0.29598	-0.0811752	-0.113733	-0.269681	-0.559238	-0.221469	-0.646625	-1.47746
Horse 8	Ventil-ate	15-min pre-transport	0.130886	0.114632	-0.0708041	-0.0271566	-0.0248779	-0.0195429	-0.29964	-0.349397	-0.280479	-2.1818	-0.690834
Horse 8	Ventil-ate	Day 1 post-transport	-0.237835	-0.343801	-0.257901	-0.345816	-0.0884117	-0.316067	-0.106675	-0.340355	-1.374	-1.58161	-0.954439
Horse 8	Ventil-ate	Day 14 post-transport	-0.17047	0.206115	-0.526311	-0.461946	-0.358853	-0.343637	-0.426926	-0.39544	0.544081	-2.22139	-0.1568
Horse 8	Ventil-ate	Day -21	-0.357008	-0.0160177	-0.184162	-0.0403356	-0.186485	-0.180154	-0.466916	-0.130422	0.0406335	-0.162102	-1.14782
Horse 8	Ventil-ate	Day 21 post-transport	-0.137898	0.236912	-0.231821	-0.351708	0.171082	-0.645151	-0.341617	-0.274099	-0.547071	-1.48319	-0.45908
Horse 8	Ventil-ate	Day 3 post-transport	-0.304141	0.0177974	-0.0623463	-0.0180645	-0.0386259	-0.363922	-0.35831	-0.212176	-0.27973	-0.559963	-0.525214
Horse 8	Ventil-ate	Day 7 post-transport	-0.302327	-0.0624203	-0.676337	-0.613053	-0.574229	-0.586087	-0.477899	-0.578562	-1.11973	-2.29754	-0.797968
Horse 9	Ventil-ate	15-min post-transport	-0.6988	-1.72568	-0.176556	-0.0962244	0.715045	0.0316215	0.0546966	-0.0987917	-0.748135	-2.50671	-1.079
Horse 9	Ventil-ate	15-min pre-transport	-0.207245	-0.789311	-0.567873	-0.264857	0.505419	0.254858	-0.423245	0.184719	-0.427994	-1.46159	-0.170376
Horse 9	Ventil-ate	Day 1 post-transport	-0.373791	-1.32329	-1.15357	-0.532498	0.188675	-0.0700794	-0.639895	-0.166852	-0.829661	-3.02654	-0.574909
Horse 9	Ventil-ate	Day 14 post-transport	-0.394554	-1.89185	-1.04658	-0.0441626	-0.436518	0.0741954	-0.61707	-0.227222	0.83101	-1.9549	-0.945444
Horse 9	Ventil-ate	Day -21	-0.205241	-0.930699	-0.924574	-0.410591	0.261751	0.106169	-0.464887	-0.16856	-1.07684	-1.98155	-0.293855
Horse 9	Ventil-ate	Day 21 post-transport	-0.113404	-0.850777	-1.08553	-0.436284	0.342268	-0.358743	-0.188519	0.0139956	-0.697078	-2.62228	0.010372
Horse 9	Ventil-ate	Day 3 post-transport	-0.343414	-0.898386	-0.988517	-0.169727	0.334033	-0.483666	-0.409718	-0.246378	-0.759071	-0.423378	-0.586752
Horse 9	Ventil-ate	Day 7 post-transport	-0.181633	-1.04309	-0.696474	-0.0191759	0.852563	-0.282688	-0.362304	-0.0392884	-0.194383	-2.07633	-0.804083
Horse 10	Ventil-ate	15-min post-transport	-0.935598	-0.62814	0.39951	-0.157444	0.604853	-0.388129	0.116243	0.269099	0.0635446	0.0145336	-0.329848
Horse 10	Ventil-ate	15-min pre-transport	0.00549227	-0.368995	0.164647	0.138012	-0.152618	-0.38101	-0.175544	0.415817	-0.539464	0.461553	0.0625454
Horse 10	Ventil-ate	Day 1 post-transport	-0.0388222	-0.396231	-0.0807048	-0.0149311	0.233935	-0.152466	0.0467949	0.327997	0.481737	-0.69527	0.0695852
Horse 10	Ventil-ate	Day 14 post-transport	-0.578808	-1.11138	-0.130384	0.110294	-0.150063	-0.75483	-0.558723	0.121737	-0.545377	-0.517428	-0.640884
Horse 10	Ventil-ate	Day -21	-0.331027	0.249953	-0.203933	0.0860533	0.294458	0.00834728	-0.468848	-0.0246547	0.754829	1.33637	-0.304392
Horse 10	Ventil-ate	Day 21 post-transport	-0.0717938	-1.27107	0.260922	0.602661	0.389073	-0.421139	-0.178421	0.390745	-0.294167	-2.05201	-0.694787
Horse 10	Ventil-ate	Day 3 post-transport	-0.611313	-1.07593	0.0543662	-0.0432575	-0.183452	-0.80295	-0.425696	0.173919	-0.314577	-1.24776	-0.872802
Horse 10	Ventil-ate	Day 7 post-transport	-0.16551	-0.916906	-0.0892435	-0.0888671	-0.00332105	-0.563541	-0.132728	0.202138	0.407952	-1.77411	-0.0340523
Horse 11	Ventil-ate	15-min post-transport	-0.17353	-0.461605	-0.210877	-0.124921	0.266356	-0.15114	0.213885	-0.114477	-0.174108	0.560587	-0.718797
Horse 11	Ventil-ate	15-min pre-transport	0.120336	0.56353	-0.210992	0.138387	-0.359541	0.0604967	-0.0485949	-0.156888	-0.239766	1.88806	-0.825388
Horse 11	Ventil-ate	Day 1 post-transport	0.236125	0.140998	-0.352629	-0.173181	0.0602597	-0.0334395	0.180922	-0.0927712	-0.218896	0.605386	0.386058
Horse 11	Ventil-ate	Day 14 post-transport	0.474864	0.0200595	-0.44923	-0.253609	0.14064	-0.44343	0.355906	0.0518304	0.288144	-0.0411861	0.813383
Horse 11	Ventil-ate	Day 21 post-transport	0.327301	0.633613	-0.339795	-0.0882342	0.209021	0.0747229	0.175716	-0.220146	0.801506	0.726204	0.488708
Horse 11	Ventil-ate	Day 3 post-transport	-0.127649	-0.0372777	-0.382034	-0.0514755	-0.331674	-0.28113	-0.0336826	-0.432918	-0.524995	1.32027	-0.574447
Horse 11	Ventil-ate	Day 7 post-transport	0.158843	-0.115957	-0.228022	0.277599	-0.0767923	-0.309834	-0.181897	-0.0790405	-0.525747	1.11059	-0.796912
Horse 11	Ventil-ate	Day -21	-0.0720213	0.144931	-0.283332	0.232714	-0.298615	0.0475863	-0.129811	-0.305363	-0.615532	1.60136	-0.569989
Horse 12	Ventil-ate	15-min post-transport	-0.874206	-0.667206	0.479058	-0.206127	0.679484	0.0774077	0.417244	-0.364859	-0.350315	-0.170966	-0.564878
Horse 12	Ventil-ate	15-min pre-transport	-0.457227	-0.443606	-0.109556	-0.0462711	-0.129833	-0.287636	0.193683	-0.371481	0.173623	0.143145	-0.986319
Horse 12	Ventil-ate	Day 1 post-transport	-0.205011	0.145103	0.286149	-0.194094	-0.108086	0.327208	0.268912	-0.26065	0.00407967	0.264178	-0.248271
Horse 12	Ventil-ate	Day 14 post-transport	-0.547936	-0.0526349	-0.10844	-0.515558	-0.0529918	-0.241936	0.00969594	-0.42729	0.172686	-0.830418	-0.137233
Horse 12	Ventil-ate	Day -21	-0.332295	-0.0393783	0.114636	-0.624122	-0.123509	-0.250585	0.146394	-0.481863	-0.168849	-3.47778	0.203965
Horse 12	Ventil-ate	Day 21 post-transport	-0.241947	-0.0186415	0.590319	-0.0936612	0.295754	-0.266002	0.210502	-0.298785	-0.874154	0.129743	-0.140615
Horse 12	Ventil-ate	Day 3 post-transport	-0.956058	-0.484458	-0.0350176	-0.465096	-0.414651	-0.319883	-0.418057	-0.657917	-0.321436	-0.0468619	-1.077
Horse 12	Ventil-ate	Day 7 post-transport	-0.163147	0.234508	0.259232	-0.23504	0.373313	0.0666532	0.416866	-0.0490485	0.00163247	-0.296293	0.311272

## Sheet: FlowCytometryIFNy
Horse #	Group	Time point	% of gated IFNγ+ lymphocytes (media)	% of gated IFNγ+ lymphocytes (PMA/ionomycin)	Δ % of gated IFNγ+ lymphocytes	MFI (geometric mean) of IFNγ+ lymphocytes (media)	MFI (geometric mean) of IFNγ+ lymphocytes (PMA/ionomycin)	Δ MFI (geometric mean) of IFNγ+ lymphocytes
Horse 1	Control	15-min post-transport	1.043	15.568	14.525	1570	5813	4243
Horse 1	Control	15-min pre-transport	1.085	26.948	25.863	2234	8815	6581
Horse 1	Control	Day 1 post-transport	1.031	12.732	11.701	1198	5311	4113
Horse 1	Control	Day 14 post-transport	1.154	15.279	14.125	1540	6068	4528
Horse 1	Control	Day -21	1.126	30.41	29.284	1311	8843	7532
Horse 1	Control	Day 21 post-transport	1.01	12.715	11.705	2344	5617	3273
Horse 1	Control	Day 3 post-transport	1.019	15.383	14.364	3209	6330	3121
Horse 1	Control	Day 7 post-transport	1.116	12.976	11.86	1293	4427	3134
Horse 2	Control	15-min post-transport	0.998	24.935	23.937	2514	12026	9512
Horse 2	Control	15-min pre-transport	1.063	16.019	14.956	2709	6480	3771
Horse 2	Control	Day 1 post-transport	1.081	38.873	37.792	1410	11502	10092
Horse 2	Control	Day 14 post-transport	1.081	18.799	17.718	1497	10005	8508
Horse 2	Control	Day 21 post-transport	1.039	22.932	21.893	1289	11263	9974
Horse 2	Control	Day 3 post-transport	1.07	28.9	27.83	1667	11335	9668
Horse 2	Control	Day 7 post-transport	1.028	19.844	18.816	1561	10364	8803
Horse 2	Control	Day -21	1.058	41.252	40.194	2563	12794	10231
Horse 3	Control	15-min post-transport	1.064	36.205	35.141	975	5283	4308
Horse 3	Control	15-min pre-transport	1.01	32.828	31.818	1607	5090	3483
Horse 3	Control	Day 1 post-transport	1.062	32.33	31.268	961	4898	3937
Horse 3	Control	Day 14 post-transport	1.08	32.552	31.472	824	4929	4105
Horse 3	Control	Day 21 post-transport	1.079	28.904	27.825	2213	5141	2928
Horse 3	Control	Day 3 post-transport	1.139	31.885	30.746	872	5120	4248
Horse 3	Control	Day 7 post-transport	1.058	33.362	32.304	793	5059	4266
Horse 3	Control	Day -21	1.094	32.29	31.196	873	5161	4288
Horse 4	Control	15-min post-transport	0.992	29.318	28.326	5159	6061	902
Horse 4	Control	15-min pre-transport	1.009	32.71	31.701	2566	5444	2878
Horse 4	Control	Day 1 post-transport	1.024	31.337	30.313	1393	6141	4748
Horse 4	Control	Day 14 post-transport	1.069	31.486	30.417	1096	6116	5020
Horse 4	Control	Day 21 post-transport	1.012	26.049	25.037	3216	5887	2671
Horse 4	Control	Day 3 post-transport	1.095	28.89	27.795	1301	6098	4797
Horse 4	Control	Day 7 post-transport	1.136	31.578	30.442	4615	6076	1461
Horse 4	Control	Day -21	1.058	30.066	29.008	1686	5684	3998
Horse 5	Control	15-min post-transport	1.035	40.611	39.576	1499	11386	9887
Horse 5	Control	15-min pre-transport	1.083	32.683	31.6	1218	10357	9139
Horse 5	Control	Day 1 post-transport	1.07	48.552	47.482	1729	13479	11750
Horse 5	Control	Day 14 post-transport	1.072	29.606	28.534	1252	11259	10007
Horse 5	Control	Day 21 post-transport	1.038	15.79	14.752	984	8489	7505
Horse 5	Control	Day 3 post-transport	1.074	28.609	27.535	2177	10848	8671
Horse 5	Control	Day 7 post-transport	1.074	22.531	21.457	1448	9892	8444
Horse 5	Control	Day -21	1.032	37.685	36.653	1922	13192	11270
Horse 6	Control	15-min post-transport	1.124	33.456	32.332	2113	12664	10551
Horse 6	Control	15-min pre-transport	1.12	27.487	26.367	1803	10327	8524
Horse 6	Control	Day 1 post-transport	1.124	41.066	39.942	2658	15432	12774
Horse 6	Control	Day 14 post-transport	1.14	36.72	35.58	1297	14730	13433
Horse 6	Control	Day -21	1.133	47.502	46.369	1268	14863	13595
Horse 6	Control	Day 21 post-transport	0.993	34.325	33.332	1281	15497	14216
Horse 6	Control	Day 3 post-transport	1.025	36.524	35.499	3523	14852	11329
Horse 6	Control	Day 7 post-transport	1.083	40.119	39.036	2473	14024	11551
Horse 7	Ventil-ate	15-min post-transport	1.05	24.059	23.009	1216	9590	8374
Horse 7	Ventil-ate	15-min pre-transport	1.044	19.144	18.1	3695	9611	5916
Horse 7	Ventil-ate	Day 1 post-transport	1.036	26.667	25.631	1276	9965	8689
Horse 7	Ventil-ate	Day 14 post-transport	1.103	23.552	22.449	3061	10318	7257
Horse 7	Ventil-ate	Day -21	1.026	27.148	26.122	3776	10936	7160
Horse 7	Ventil-ate	Day 21 post-transport	1.098	17.182	16.084	2886	10353	7467
Horse 7	Ventil-ate	Day 3 post-transport	1.038	21.22	20.182	1999	10189	8190
Horse 7	Ventil-ate	Day 7 post-transport	1.118	21.92	20.802	1632	10579	8947
Horse 8	Ventil-ate	15-min post-transport	1.113	10.145	9.032	1034	5916	4882
Horse 8	Ventil-ate	15-min pre-transport	1.05	23.829	22.779	2374	9507	7133
Horse 8	Ventil-ate	Day 1 post-transport	1.1	13.512	12.412	2197	6823	4626
Horse 8	Ventil-ate	Day 14 post-transport	0.994	18.532	17.538	2195	9600	7405
Horse 8	Ventil-ate	Day -21	1.067	19.763	18.696	3920	9804	5884
Horse 8	Ventil-ate	Day 21 post-transport	1.032	20.232	19.2	1792	10321	8529
Horse 8	Ventil-ate	Day 3 post-transport	1.126	16.164	15.038	1689	8238	6549
Horse 8	Ventil-ate	Day 7 post-transport	1.083	14.913	13.83	1493	7514	6021
Horse 9	Ventil-ate	15-min post-transport	1.063	34.106	33.043	1552	10617	9065
Horse 9	Ventil-ate	15-min pre-transport	1.074	34.431	33.357	3065	10963	7898
Horse 9	Ventil-ate	Day 1 post-transport	1.04	43.734	42.694	1499	12063	10564
Horse 9	Ventil-ate	Day 14 post-transport	1.05	42.03	40.98	1398	12031	10633
Horse 9	Ventil-ate	Day -21	1.073	47.574	46.501	1594	13477	11883
Horse 9	Ventil-ate	Day 21 post-transport	1.074	42.241	41.167	1271	13737	12466
Horse 9	Ventil-ate	Day 3 post-transport	1.019	40.912	39.893	1462	12850	11388
Horse 9	Ventil-ate	Day 7 post-transport	1.073	34.132	33.059	1572	10402	8830
Horse 10	Ventil-ate	15-min post-transport	1.009	25.916	24.907	1494	8910	7416
Horse 10	Ventil-ate	15-min pre-transport	1.031	30.46	29.429	1807	11270	9463
Horse 10	Ventil-ate	Day 1 post-transport	1.06	41.6	40.54	1615	11040	9425
Horse 10	Ventil-ate	Day 14 post-transport	1.053	35.696	34.643	1145	10581	9436
Horse 10	Ventil-ate	Day -21	1.019	36.2	35.181	1512	12188	10676
Horse 10	Ventil-ate	Day 21 post-transport	1.013	33.35	32.337	1729	12256	10527
Horse 10	Ventil-ate	Day 3 post-transport	1.012	44.487	43.475	1482	11223	9741
Horse 10	Ventil-ate	Day 7 post-transport	1.11	32.935	31.825	1265	10697	9432
Horse 11	Ventil-ate	15-min post-transport	1.039	34.962	33.923	1984	5825	3841
Horse 11	Ventil-ate	15-min pre-transport	1.135	11.267	10.132	1054	2701	1647
Horse 11	Ventil-ate	Day 1 post-transport	1.037	33.915	32.878	5757	5474	-283
Horse 11	Ventil-ate	Day 14 post-transport	1.185	32.731	31.546	4680	6523	1843
Horse 11	Ventil-ate	Day 21 post-transport	0.992	18.252	17.26	904	4344	3440
Horse 11	Ventil-ate	Day 3 post-transport	1.004	31.738	30.734	903	5153	4250
Horse 11	Ventil-ate	Day 7 post-transport	1.029	27.401	26.372	7797	5405	-2392
Horse 11	Ventil-ate	Day -21	1.147	31.353	30.206	1101	5773	4672
Horse 12	Ventil-ate	15-min post-transport	1.156	11.348	10.192	913	2822	1909
Horse 12	Ventil-ate	15-min pre-transport	1.038	20.035	18.997	6237	4916	-1321
Horse 12	Ventil-ate	Day 1 post-transport	1.022	12.471	11.449	926	3446	2520
Horse 12	Ventil-ate	Day 14 post-transport	1.098	13.679	12.581	996	4978	3982
Horse 12	Ventil-ate	Day -21	1.093	16.671	15.578	16624	4999	-11625
Horse 12	Ventil-ate	Day 21 post-transport	1.18	14.537	13.357	6329	5103	-1226
Horse 12	Ventil-ate	Day 3 post-transport	1.057	15.644	14.587	984	4364	3380
Horse 12	Ventil-ate	Day 7 post-transport	1.096	14.896	13.8	992	4713	3721

## Sheet: FlowCytometryTNFa
Horse #	Group	Time point	% of gated TNFα+ lymphocytes (media)	MFI (geometric mean) of TNFα+ lymphocytes (media)	% of gated TNFα+ lymphocytes (PMA/ionomycin)	MFI (geometric mean) of TNFα+ lymphocytes (PMA/ionomycin)	Δ % of gated TNFα+ lymphocytes	Δ MFI (geometric mean) of TNFα+ lymphocytes
Horse 1	Control	15-min post-transport	1.122	1452	21.31	5619	20.188	4167
Horse 1	Control	15-min pre-transport	1.047	1223	39.822	8678	38.775	7455
Horse 1	Control	Day 1 post-transport	1.027	1690	17.751	5312	16.724	3622
Horse 1	Control	Day 14 post-transport	1.045	905	21.582	5125	20.537	4220
Horse 1	Control	Day -21	1.032	5724	42.936	8532	41.904	2808
Horse 1	Control	Day 21 post-transport	1.117	1046	20.582	5096	19.465	4050
Horse 1	Control	Day 3 post-transport	1.111	1508	23.884	6029	22.773	4521
Horse 1	Control	Day 7 post-transport	1.07	1043	16.815	4531	15.745	3488
Horse 2	Control	15-min post-transport	0.994	992	42.994	9528	42	8536
Horse 2	Control	15-min pre-transport	1.087	1202	28.577	6276	27.49	5074
Horse 2	Control	Day 1 post-transport	1.07	1135	58.038	10877	56.968	9742
Horse 2	Control	Day 14 post-transport	1.088	1031	38.783	8503	37.695	7472
Horse 2	Control	Day 21 post-transport	1.053	1027	40.427	9674	39.374	8647
Horse 2	Control	Day 3 post-transport	1.082	1293	40.418	9512	39.336	8219
Horse 2	Control	Day 7 post-transport	1.076	872	36.696	8163	35.62	7291
Horse 2	Control	Day -21	1.114	918	63.498	12144	62.384	11226
Horse 3	Control	15-min post-transport	1.06	1375	49.935	13556	48.875	12181
Horse 3	Control	15-min pre-transport	1.018	1423	47.673	13382	46.655	11959
Horse 3	Control	Day 1 post-transport	1.084	1092	52.701	13155	51.617	12063
Horse 3	Control	Day 14 post-transport	1.019	2243	46.8	12764	45.781	10521
Horse 3	Control	Day 21 post-transport	1.049	904	46.169	12814	45.12	11910
Horse 3	Control	Day 3 post-transport	1.092	1659	53.427	12980	52.335	11321
Horse 3	Control	Day 7 post-transport	1.094	1111	48.686	12622	47.592	11511
Horse 3	Control	Day -21	1.02	1636	54.31	13767	53.29	12131
Horse 4	Control	15-min post-transport	1.085	1116	45.46	9980	44.375	8864
Horse 4	Control	15-min pre-transport	0.995	1395	54.097	12183	53.102	10788
Horse 4	Control	Day 1 post-transport	1.129	1193	49.474	10020	48.345	8827
Horse 4	Control	Day 14 post-transport	0.994	1152	47.709	10760	46.715	9608
Horse 4	Control	Day 21 post-transport	1.03	1034	42.546	8536	41.516	7502
Horse 4	Control	Day 3 post-transport	1.081	1447	46.819	10386	45.738	8939
Horse 4	Control	Day 7 post-transport	1.119	1087	46.51	10177	45.391	9090
Horse 4	Control	Day -21	1.048	1840	51.431	11333	50.383	9493
Horse 5	Control	15-min post-transport	1.173	1263	52.664	10443	51.491	9180
Horse 5	Control	15-min pre-transport	1.022	3266	41.769	10709	40.747	7443
Horse 5	Control	Day 1 post-transport	1.056	1564	62.41	12606	61.354	11042
Horse 5	Control	Day 14 post-transport	1.043	1629	44.181	11207	43.138	9578
Horse 5	Control	Day 21 post-transport	1.091	1263	25.759	8359	24.668	7096
Horse 5	Control	Day 3 post-transport	0.993	1329	43.481	10399	42.488	9070
Horse 5	Control	Day 7 post-transport	1.035	1339	40.251	9929	39.216	8590
Horse 5	Control	Day -21	1.125	2163	55.599	13184	54.474	11021
Horse 6	Control	15-min post-transport	1.073	1204	50.508	11639	49.435	10435
Horse 6	Control	15-min pre-transport	1.03	2584	43.006	10421	41.976	7837
Horse 6	Control	Day 1 post-transport	1.128	972	54.043	11258	52.915	10286
Horse 6	Control	Day 14 post-transport	1.1	930	50.049	10242	48.949	9312
Horse 6	Control	Day -21	1.089	1486	60.262	16392	59.173	14906
Horse 6	Control	Day 21 post-transport	1.086	1295	49.393	10622	48.307	9327
Horse 6	Control	Day 3 post-transport	1.117	1015	50.316	10480	49.199	9465
Horse 6	Control	Day 7 post-transport	1.108	766	53.454	1153	52.346	387
Horse 7	Ventil-ate	15-min post-transport	1.093	889	46.831	8556	45.738	7667
Horse 7	Ventil-ate	15-min pre-transport	1.042	1157	36.541	9019	35.499	7862
Horse 7	Ventil-ate	Day 1 post-transport	1.032	1299	49.537	9471	48.505	8172
Horse 7	Ventil-ate	Day 14 post-transport	1.031	1161	41.885	8393	40.854	7232
Horse 7	Ventil-ate	Day -21	1.014	2285	44.993	10770	43.979	8485
Horse 7	Ventil-ate	Day 21 post-transport	1.083	938	32.332	6902	31.249	5964
Horse 7	Ventil-ate	Day 3 post-transport	1.12	1182	40.136	7728	39.016	6546
Horse 7	Ventil-ate	Day 7 post-transport	1.052	1198	40.601	7760	39.549	6562
Horse 8	Ventil-ate	15-min post-transport	0.994	1156	17.903	5568	16.909	4412
Horse 8	Ventil-ate	15-min pre-transport	1.101	2031	34.344	8814	33.243	6783
Horse 8	Ventil-ate	Day 1 post-transport	1.071	1092	25.176	6221	24.105	5129
Horse 8	Ventil-ate	Day 14 post-transport	0.995	1134	33.825	8893	32.83	7759
Horse 8	Ventil-ate	Day -21	1.071	1882	29.975	7989	28.904	6107
Horse 8	Ventil-ate	Day 21 post-transport	1.026	1053	33.007	8636	31.981	7583
Horse 8	Ventil-ate	Day 3 post-transport	1.049	1269	28.995	6985	27.946	5716
Horse 8	Ventil-ate	Day 7 post-transport	1.087	1268	23.248	6486	22.161	5218
Horse 9	Ventil-ate	15-min post-transport	1.106	1111	45.872	11773	44.766	10662
Horse 9	Ventil-ate	15-min pre-transport	1.019	1252	42.284	11069	41.265	9817
Horse 9	Ventil-ate	Day 1 post-transport	1.016	1447	59.024	12525	58.008	11078
Horse 9	Ventil-ate	Day 14 post-transport	1.119	1168	49.568	11593	48.449	10425
Horse 9	Ventil-ate	Day -21	1.035	1002	64.354	13693	63.319	12691
Horse 9	Ventil-ate	Day 21 post-transport	1.013	1121	54.407	11212	53.394	10091
Horse 9	Ventil-ate	Day 3 post-transport	1.035	3617	58.509	13126	57.474	9509
Horse 9	Ventil-ate	Day 7 post-transport	0.993	6867	45.901	9666	44.908	2799
Horse 10	Ventil-ate	15-min post-transport	1.008	1056	48.179	10467	47.171	9411
Horse 10	Ventil-ate	15-min pre-transport	1.011	1135	53.408	12683	52.397	11548
Horse 10	Ventil-ate	Day 1 post-transport	1.074	1065	64.866	14303	63.792	13238
Horse 10	Ventil-ate	Day 14 post-transport	1.074	870	57.807	12370	56.733	11500
Horse 10	Ventil-ate	Day -21	0.998	1126	58.245	15223	57.247	14097
Horse 10	Ventil-ate	Day 21 post-transport	1.051	912	49.404	10164	48.353	9252
Horse 10	Ventil-ate	Day 3 post-transport	0.99	1155	60.425	13584	59.435	12429
Horse 10	Ventil-ate	Day 7 post-transport	1.065	841	47.532	10194	46.467	9353
Horse 11	Ventil-ate	15-min post-transport	1.064	1012	45.796	9421	44.732	8409
Horse 11	Ventil-ate	15-min pre-transport	1.118	1558	13.064	4796	11.946	3238
Horse 11	Ventil-ate	Day 1 post-transport	1.096	1777	42.822	9438	41.726	7661
Horse 11	Ventil-ate	Day 14 post-transport	1.092	1210	44.35	11179	43.258	9969
Horse 11	Ventil-ate	Day 21 post-transport	0.997	1776	22.16	7308	21.163	5532
Horse 11	Ventil-ate	Day 3 post-transport	1.115	8752	49.101	11649	47.986	2897
Horse 11	Ventil-ate	Day 7 post-transport	0.999	1179	34.013	8181	33.014	7002
Horse 11	Ventil-ate	Day -21	1.112	2033	40.705	11177	39.593	9144
Horse 12	Ventil-ate	15-min post-transport	0.99	1211	16.337	4791	15.347	3580
Horse 12	Ventil-ate	15-min pre-transport	1.069	4470	35.747	10316	34.678	5846
Horse 12	Ventil-ate	Day 1 post-transport	1.055	1932	18.421	5830	17.366	3898
Horse 12	Ventil-ate	Day 14 post-transport	1.049	1181	29.158	7596	28.109	6415
Horse 12	Ventil-ate	Day -21	1.027	1492	35.455	9300	34.428	7808
Horse 12	Ventil-ate	Day 21 post-transport	1.121	1137	31.756	8434	30.635	7297
Horse 12	Ventil-ate	Day 3 post-transport	1.038	3351	29.321	8837	28.283	5486
Horse 12	Ventil-ate	Day 7 post-transport	1.107	925	26.321	7028	25.214	6103
